# Supplementary material for: Clinical and exercise professional opinion of return-to-running readiness after childbirth: an international Delphi study and consensus statement
Source: HighWire-hosted journal article supplement (doi:10.1136/bjsports-2023-107489), 2023-12-26
Supplement: bjsports-2023-107489supp002_data_supplement.pdf [file bjsports-2023-107489supp002_data_supplement.pdf]

| <b>Supplemental Digital Content: Current Level Evidence Section Levels of Evidence</b>     |                                    |                                         |                          |
|--------------------------------------------------------------------------------------------|------------------------------------|-----------------------------------------|--------------------------|
| <b>Definitions of ‘runner’ and ‘postpartum’</b>                                            | <b>Authors</b>                     | <b>Study Design</b>                     | <b>Level of Evidence</b> |
|                                                                                            | Christopher et al <sup>7</sup>     | Cohort Study                            | Level III                |
|                                                                                            | Moore et al <sup>8</sup>           | Cohort Study                            | Level III                |
|                                                                                            | Blyholder et al <sup>9</sup>       | Cohort Study                            | Level III                |
|                                                                                            | Donnelly et al <sup>11</sup>       | Cohort Study                            | Level III                |
|                                                                                            | James et al <sup>12</sup>          | Cohort Study                            | Level III                |
|                                                                                            | Foch et al <sup>34</sup>           | Systematic Review and Meta Analysis     | Level I                  |
|                                                                                            | Kakouris et al <sup>35</sup>       | Systematic Review                       | Level I                  |
|                                                                                            | Paladine et al <sup>36</sup>       | Editorial                               | level V                  |
|                                                                                            | Thein-Nissenbaum, J <sup>37</sup>  | Cohort Study                            | Level V                  |
|                                                                                            | Deering et al <sup>38</sup>        | Cohort Study                            | Level III                |
|                                                                                            | Hills et al <sup>39</sup>          | Cohort Study                            | Level III                |
|                                                                                            | Deering et al <sup>40</sup>        | Cohort Study                            | Level III                |
|                                                                                            | Deering et al <sup>41</sup>        | Cohort Study                            | Level III                |
|                                                                                            | Deering et al <sup>42</sup>        | Cohort Study                            | Level III                |
|                                                                                            | Christopher et al <sup>43</sup>    | Cohort Study                            | Level III                |
| Putnick et al <sup>44</sup>                                                                | Cohort Study                       | Level III                               |                          |
| <b>Key Milestones that Need to be Assessed/Reached Before Postpartum Return-to-Running</b> | Bo et al <sup>6</sup>              | Consensus statement & systematic review | Level I                  |
|                                                                                            | Moore et al <sup>8</sup>           | Cohort Study                            | Level III                |
|                                                                                            | Blyholder et al <sup>9</sup>       | Cohort Study                            | Level III                |
|                                                                                            | Christopher et al <sup>43</sup>    | Clinical Commentary                     | Level V                  |
|                                                                                            | Donnelly et al <sup>18</sup>       | Expert opinion                          | Level V                  |
|                                                                                            | Deering et al <sup>38</sup>        | Cohort Study                            | Level III                |
|                                                                                            | Hills et al <sup>39</sup>          | Cohort Study                            | Level III                |
|                                                                                            | Deering et al <sup>41</sup>        | Cohort Study                            | Level III                |
|                                                                                            | Deering et al <sup>42</sup>        | Cohort Study                            | Level III                |
|                                                                                            | Christopher et al <sup>45</sup>    | Cohort Study                            | Level III                |
|                                                                                            | Christopher et al <sup>16</sup>    | Clinical Commentary                     | Level V                  |
|                                                                                            | Guzmán Rojas et al <sup>46</sup>   | Cohort Study                            | Level III                |
|                                                                                            | Hilde et al <sup>47</sup>          | Cohort Study                            | Level III                |
|                                                                                            | Hilde et al <sup>48</sup>          | Cohort Study                            | Level III                |
|                                                                                            | Martin- Martin et al <sup>49</sup> | Cohort Study                            | Level III                |
|                                                                                            | Nygaard and Shaw <sup>50</sup>     | Narrative Review                        | Level V                  |
|                                                                                            | Reimers et al <sup>51</sup>        | Cohort Study                            | Level III                |
| Shin et al <sup>52</sup>                                                                   | Narrative Review                   | Level V                                 |                          |

|                                  |                                        |                                     |           |
|----------------------------------|----------------------------------------|-------------------------------------|-----------|
|                                  | Stær-Jensen et al <sup>53</sup>        | Cohort Study                        | Level III |
|                                  | Vermandel et al <sup>54</sup>          | Cohort Study                        | Level III |
|                                  | Wallace et al <sup>55</sup>            | Narrative Review                    | Level V   |
|                                  | Hadizadeh-Talasaz et al <sup>56</sup>  | Systematic review and Meta Analysis | Level I   |
|                                  | Carvalhais et al <sup>57</sup>         | Cohort Study                        | Level III |
|                                  | de Mattos Lourenco et al <sup>58</sup> | Systematic Review                   | Level I   |
|                                  | Fornier et al <sup>59</sup>            | Cohort Study                        | Level III |
|                                  | NICE Guidelines <sup>60</sup>          | Review                              | Level V   |
|                                  | Borello-France et al <sup>61</sup>     | Cohort study                        | Level III |
|                                  | Blomquist et al <sup>62</sup>          | Cohort study                        | Level III |
|                                  | Moser et al <sup>63</sup>              | Systematic Review                   | Level I   |
|                                  | Woodley et al <sup>64</sup>            | Cochrane Review                     | Level I   |
|                                  | Peterson et al <sup>65</sup>           | Systematic review and Meta Analysis | Level I   |
|                                  | Gluppe et al <sup>66</sup>             | Cohort Study                        | Level III |
|                                  | Fuentes Aparicioa et al <sup>67</sup>  | Systematic Review                   | Level I   |
|                                  | Sperstad et al <sup>68</sup>           | Cohort Study                        | Level III |
|                                  | Eriksson Crommert et al <sup>69</sup>  | Cohort Study                        | Level III |
|                                  | Eriksson Crommert et al <sup>70</sup>  | Cohort Study                        | Level III |
|                                  | Gluppe et al <sup>71</sup>             | Systematic Review and Meta Analysis | Level I   |
|                                  | Carlstedt et al <sup>72</sup>          | Narrative Review                    | Level V   |
|                                  | Gluppe et al <sup>73</sup>             | Randomized Control Trial            | Level I   |
|                                  | Goossens et al <sup>74</sup>           | Systematic review                   | Level I   |
|                                  | Bagwell et al <sup>75</sup>            | Cohort study                        | Level III |
|                                  | Ramachandra et al <sup>76</sup>        | Cohort study                        | Level III |
|                                  | Han et al <sup>77</sup>                | Systematic review and meta-analysis | Level I   |
|                                  | Plastaras et al <sup>78</sup>          | Narrative Review                    | Level V   |
|                                  | van der Worp et al <sup>79</sup>       | Systematic review                   | Level I   |
|                                  | West et al <sup>80</sup>               | Systematic review and meta-analysis | Level I   |
| <b>Load and impact screening</b> | Christopher et al <sup>16</sup>        | Clinical Commentary                 | Level V   |
|                                  | Donnelly et al <sup>17</sup>           | Clinical Commentary                 | Level V   |
|                                  | Donnelly et al <sup>18</sup>           | Expert opinion                      | Level V   |
|                                  | Goom et al <sup>19</sup>               | Expert opinion (Grey literature)    | Level V   |
|                                  | Deering et al <sup>20</sup>            | Clinical Commentary                 | Level V   |

|                                                     |                                     |                                            |           |
|-----------------------------------------------------|-------------------------------------|--------------------------------------------|-----------|
|                                                     | Harrison et al <sup>81</sup>        | Cohort study                               | Level III |
|                                                     | Goodson et al <sup>82</sup>         | Cohort study                               | Level III |
|                                                     | Casey and Temme <sup>83</sup>       | Narrative Review                           | Level V   |
|                                                     | Pires et al <sup>84</sup>           | Systematic Review & Meta-Analysis          | Level I   |
|                                                     | Nygaard and Shaw <sup>50</sup>      | Narrative Review                           | Level V   |
|                                                     |                                     |                                            |           |
| <b>Screening for biopsychosocial milestones</b>     | Bo et al <sup>6</sup>               | Consensus statement with systematic review | Level I   |
|                                                     | Christopher et al <sup>7</sup>      | Cohort study                               | Level III |
|                                                     | Moore et al <sup>8</sup>            | Cohort study                               | Level III |
|                                                     | Davenport et al <sup>13</sup>       | Cohort Study                               | Level III |
|                                                     | Christopher et al <sup>16</sup>     | Clinical Commentary                        | Level V   |
|                                                     | Donnelly et al <sup>17</sup>        | Clinical Commentary                        | Level V   |
|                                                     | Donnelly et al <sup>18</sup>        | Expert opinion                             | Level V   |
|                                                     | Goom et al <sup>19</sup>            | Expert opinion                             | Level V   |
|                                                     | Deering et al <sup>20</sup>         | Viewpoint                                  | Level V   |
|                                                     | Deering et al <sup>23</sup>         | Consensus Statement                        | Level V   |
|                                                     | Donnelly et al <sup>21</sup>        | Editorial                                  | Level V   |
|                                                     | Christopher et al <sup>45</sup>     | Consensus Statement                        | Level V   |
|                                                     | Christopher et al <sup>85</sup>     | Systematic Review                          | Level I   |
|                                                     | Whitney et al <sup>86</sup>         | Cohort study                               | Level III |
|                                                     | Ackerman et al <sup>87</sup>        | Cohort study                               | Level III |
|                                                     | Deering and Mountjoy <sup>88</sup>  | Editorial                                  | Level V   |
|                                                     | Kołomańska-Bogucka <sup>89</sup>    | Qualitative Review                         | Level V   |
| Kimber et al <sup>90</sup>                          | Systematic Review and meta-analysis | Level I                                    |           |
|                                                     |                                     |                                            |           |
| <b>Support items/adjuncts for return to running</b> | Christopher et al <sup>16</sup>     | Clinical Commentary                        | Level V   |
|                                                     | Bugge et al <sup>91</sup>           | Cochrane Review                            | Level I   |
|                                                     | Lipp et al <sup>92</sup>            | Cochrane Review                            | Level I   |
|                                                     | Dufour et al <sup>93</sup>          | Clinical Practice Guideline                | Level V   |
|                                                     | Dakic et al <sup>94</sup>           | Cohort Study                               | Level III |
|                                                     | Brennand et al <sup>95</sup>        | Cohort Study                               | Level III |
|                                                     | Culleton-Quinn <sup>96</sup>        | Systematic Review                          | Level I   |
|                                                     | McGhee and Steele <sup>97</sup>     | Narrative Review                           | Level V   |
|                                                     | Risius et al <sup>98</sup>          | Narrative Review                           | Level V   |
|                                                     | Barbage and Cameron <sup>99</sup>   | Cohort Study                               | Level III |
|                                                     | Nolte et al <sup>100</sup>          | Cohort Study                               | Level III |

|                                                |                                             |                                                  |           |
|------------------------------------------------|---------------------------------------------|--------------------------------------------------|-----------|
|                                                | Brisbine et al <sup>101</sup>               | Cohort Study                                     | Level III |
|                                                | Coltman et al <sup>103</sup>                | Cohort Study                                     | Level III |
|                                                | Fong and Powell <sup>104</sup>              | Cohort Study                                     | Level III |
|                                                | Morris et al <sup>102</sup>                 | Cohort Study                                     | Level V   |
|                                                | Alcantara and Wall-Scheffler <sup>105</sup> | Cohort Study                                     | Level III |
|                                                | Sandbakk et al <sup>106</sup>               | Cohort Study                                     | Level III |
|                                                | O'Sullivan et al <sup>107</sup>             | Cohort Study                                     | Level III |
|                                                | Szkwarra et al <sup>108</sup>               | Systematic Review                                | Level I   |
|                                                | Gavrilov et al <sup>109</sup>               | Cohort Study                                     | Level III |
|                                                | Szkwarra et al <sup>110</sup>               | Quasi-experimental<br>Controlled Study           | Level III |
|                                                | Okayama et al <sup>111</sup>                | Randomized Control<br>Trial                      | Level I   |
|                                                | Milner et al <sup>112</sup>                 | Cohort Study                                     | Level III |
|                                                | Fitzgerald et al <sup>113</sup>             | Cohort Study                                     | Level III |
|                                                | Arumugam et al <sup>114</sup>               | Cohort Study                                     | Level III |
|                                                | Hammer et al <sup>115</sup>                 | Cohort Study                                     | Level III |
|                                                | Soisson et al <sup>116</sup>                | Cohort Study                                     | Level III |
|                                                | Toyohara et al <sup>117</sup>               | Biomechanical<br>perspective                     | Level V   |
|                                                | Jobanputra and Patil <sup>118</sup>         | Narrative Review                                 | Level V   |
|                                                | Ptaszkowska et al <sup>119</sup>            | Randomized Control<br>Trial                      | Level II  |
|                                                | Malhotra et al <sup>120</sup>               | Randomized Control<br>Trial                      | Level II  |
|                                                | Watcharakhueankhan et al <sup>121</sup>     | Cohort Study                                     | Level III |
|                                                | Ozmen et al <sup>122</sup>                  | Cohort Study                                     | Level III |
|                                                | Rogan and Baur <sup>123</sup>               | Cohort Study                                     | Level III |
| <b>Education Topics for Postpartum Runners</b> | Bo et al <sup>6</sup>                       | Consensus statement<br>with Systematic<br>Review | Level I   |
|                                                | Christopher et al <sup>7</sup>              | Cohort Study                                     | Level III |
|                                                | Moore et al <sup>8</sup>                    | Cohort Study                                     | Level III |
|                                                | Donnelly et al <sup>11</sup>                | Cohort Study                                     | Level III |
|                                                | James et al <sup>12</sup>                   | Cohort Study                                     | Level III |
|                                                | Christopher et al <sup>16</sup>             | Clinical Commentary                              | Level V   |
|                                                | Donnelly et al <sup>17</sup>                | Clinical Commentary                              | Level V   |
|                                                | Donnelly et al <sup>18</sup>                | Expert Opinion                                   | Level V   |
|                                                | Deering et al <sup>23</sup>                 | Consensus Statement                              | Level V   |
|                                                | Deering et al <sup>20</sup>                 | Clinical Commentary                              | Level V   |

|                                                                                 |                                                                        |                                     |           |
|---------------------------------------------------------------------------------|------------------------------------------------------------------------|-------------------------------------|-----------|
|                                                                                 | Donnelly et al <sup>21</sup>                                           | Editorial                           | Level V   |
|                                                                                 | Nielsen et al <sup>133</sup>                                           | Clinical Commentary                 | Level V   |
|                                                                                 | Ramskov et al <sup>134</sup>                                           | Randomized Control Trial            | Level I   |
|                                                                                 | Nielsen et al <sup>135</sup>                                           | Cohort study                        | Level III |
|                                                                                 | Ndikom et al <sup>136</sup>                                            | Cochrane Review                     | Level I   |
|                                                                                 | Bardosono et al <sup>137</sup>                                         | Cohort study                        | Level III |
|                                                                                 | Lee and Kelleher <sup>138</sup>                                        | Review                              | Level V   |
|                                                                                 | Nutrient Reference Values for Australia and New Zealand <sup>139</sup> | Position Statement                  | Level V   |
| <b>Other considerations for readiness to return-to-running after childbirth</b> | Christopher et al <sup>16</sup>                                        | Clinical Commentary                 | Level V   |
|                                                                                 | Deering et al <sup>20</sup>                                            | Viewpoint                           | Level V   |
|                                                                                 | Donnelly et al <sup>21</sup>                                           | Editorial                           | Level V   |
|                                                                                 | Tousignant-Laflamme et al <sup>124</sup>                               | Systematic Review                   | Level I   |
|                                                                                 | Hoffmann et al <sup>125</sup>                                          | Narrative Review                    | Level V   |
|                                                                                 | Makama et al <sup>126</sup>                                            | Systematic Review                   | Level I   |
|                                                                                 | Edie et al <sup>127</sup>                                              | Systematic Review                   | Level I   |
|                                                                                 | ACOG Practice Bulletin <sup>128</sup>                                  | Position Statement                  | Level V   |
|                                                                                 | Symonds and Arulkumaran <sup>129</sup>                                 | Textbook                            | Level V   |
|                                                                                 | Christopher et al <sup>7</sup>                                         | Cohort Study                        | Level III |
|                                                                                 | Moore et al <sup>8</sup>                                               | Cohort Study                        | Level III |
|                                                                                 | James et al <sup>12</sup>                                              | Cohort Study                        | Level III |
|                                                                                 | Christopher et al <sup>45</sup>                                        | Consensus Statement                 | Level V   |
|                                                                                 | van Gent et al <sup>130</sup>                                          | Systematic Review                   | Level I   |
|                                                                                 | Arnold and Moody <sup>131</sup>                                        | Narrative Review                    | Level V   |
| Bo et al <sup>132</sup>                                                         | Systematic Review                                                      | Level I                             |           |
| <b>Timeline for returning to running</b>                                        | Bo et al <sup>6</sup>                                                  | Consensus Statement                 | Level I   |
|                                                                                 | Christopher et al <sup>7</sup>                                         | Cohort Study                        | Level III |
|                                                                                 | Moore et al <sup>8</sup>                                               | Cohort Study                        | Level III |
|                                                                                 | Blyholder et al <sup>9</sup>                                           | Cohort Study                        | Level III |
|                                                                                 | James et al <sup>12</sup>                                              | Cohort Study                        | Level III |
|                                                                                 | Hilde et al <sup>47</sup>                                              | Cohort Study                        | Level III |
|                                                                                 | Hilde et al <sup>48</sup>                                              | Cohort Study                        | Level III |
|                                                                                 | Stær-Jensen et al <sup>53</sup>                                        | Cohort Study                        | Level III |
|                                                                                 | Kimber et al <sup>90</sup>                                             | Systematic Review and Meta Analysis | Level I   |
|                                                                                 | Symonds and Arulkumaran <sup>129</sup>                                 | Textbook                            | Level V   |
|                                                                                 | Tilak et al <sup>140</sup>                                             | Cohort Study                        | Level III |

|                                       |                  |           |
|---------------------------------------|------------------|-----------|
| Li et al <sup>141</sup>               | Cohort Study     | Level III |
| Snydal <sup>142</sup>                 | Narrative Review | Level V   |
| ACOG Committee Opinion <sup>143</sup> | Opinion          | Level V   |
| Tennfjord et al <sup>144</sup>        | Cohort Study     | Level III |
| Nygaard et al <sup>145</sup>          | Cohort Study     | Level III |
| Darroch et al <sup>146</sup>          | Cohort Study     | Level III |
| Rodríguez-López et al <sup>147</sup>  | Cohort Study     | Level III |
| Mahoney et al <sup>148</sup>          | Cohort Study     | Level III |
